# Supplementary material for: Tailoring the nonlinear optical performance of two-dimensional MoS2 nanofilms via defect engineering
Source: Royal Society of Chemistry journal article supplement (doi:10.1039/c8nr05653f), 2018-01-01
Supplement: c8nr05653f1.pdf [file c8nr05653f1.pdf]

## Supporting Information

### **Tailoring the Nonlinear Optical Performances of Two-dimensional MoS<sub>2</sub> Nanofilms via Defect Engineering**

Xiaoyan Zhang,<sup>a,b</sup> Saifeng Zhang,<sup>a,b</sup> Yafeng Xie,<sup>a,b,c</sup> Jiawei Huang,<sup>a,b,c</sup> Lei Wang,<sup>a,b,c</sup> Yun Cui,<sup>d</sup> Jun Wang<sup>\*a,b,e</sup>

*a* Laboratory of Micro-Nano Photonic and Optoelectronic Materials and Devices, Shanghai Institute of Optics and Fine Mechanics (SIOM), Chinese Academy of Sciences (CAS), Shanghai 201800, China. [jwang@siom.ac.cn](mailto:jwang@siom.ac.cn)

*b* Key Laboratory of Materials for High-Power Laser, Shanghai Institute of Optics and Fine Mechanics, Chinese Academy of Sciences, Shanghai 201800, China

*c* University of Chinese Academy of Sciences, Beijing 100049, China

*d* Key Laboratory of Materials for High-Power Laser, Shanghai Institute of Optics and Fine Mechanics, Chinese Academy of Sciences, Shanghai 201800, China

*e* State Key Laboratory of High Field Laser Physics, Shanghai Institute of Optics and Fine Mechanics, Chinese Academy of Sciences, Shanghai 201800, China

**Modification of Substrates.** Typically, the substrate was sequentially sonicated in ethanol, acetone, and deionized water with each for 15 min. Then the cleaned substrate was immersed in diluted Poly(diallyldimethylammonium chloride) (PDDA, 20 wt%) aqueous solution (Volume ratio of PDDA to deionized water as 1:4) for 30 min to allow PDDA adsorption, and then rinsed with deionized water and dried in an oven. Next, the PDDA-coated substrate was dipped in diluted Poly(sodium 4-styrenesulfonate) (PSS, 30 wt%) aqueous solution (Volume ratio of PSS to deionized water as 1:4) to allow the deposition of PSS in the same manner, followed by the deposition of an additional layer of PDDA. Finally, three-layered PDDA/PSS/PDDA polyelectrolytes were formed on the quartz substrate.

**Calculation of the Formation Energy of the S Vacancies.** We used the first-principles calculations to analysis the formation energy of the S vacancies. Before the calculation, the 2H MoS<sub>2</sub> with hexagonal structure was fully optimized using BFGS method. The exchange–correlation interaction between valence electrons was described using the Perdew-Burke-Ernzerhof (PBE) function within the generalized gradient approximation (GGA).<sup>1,2</sup> The cutoff energy, the maximum atom force, the intrinsic strain and the maximum shift were set as 450 eV, 0.01 eV/Å, 0.02 GPa, and  $5 \times 10^{-4}$  Å, respectively. The k-point meshes were set as 8×8×2 in the Reduced Brillouin zone. Based on the optimized structure, a Slab model with the vacuum layer of 15 Å was constructed to simulate the crystal surface. A 3×3×1 hexagonal supercell was used to calculated the S vacancies in MoS<sub>2</sub>. The calculation parameters are the same to the first step except that the k-point meshes here were chosen as 5×5×1.

The S vacancy formation energy  $\Delta E_f$  is defined by<sup>3</sup>:

$$\Delta E_f = E_{VS} - E_{bulk} + (\mu_s + \Delta\mu_s)$$

Where  $E_{VS}$  and  $E_{bulk}$  are the total energies of S-vacancy containing and defect-free supercells, respectively, and  $\Delta\mu_s$  is the chemical potential of the atom S. Here, the up limitation is set as

$\Delta\mu_S = 0$  eV, corresponding to the S-rich (O-poor) limit, and the down limitation is set as  $\Delta\mu_S = -3.74$  eV, corresponding to the S-poor (O-rich) limit.

**Figure S1**

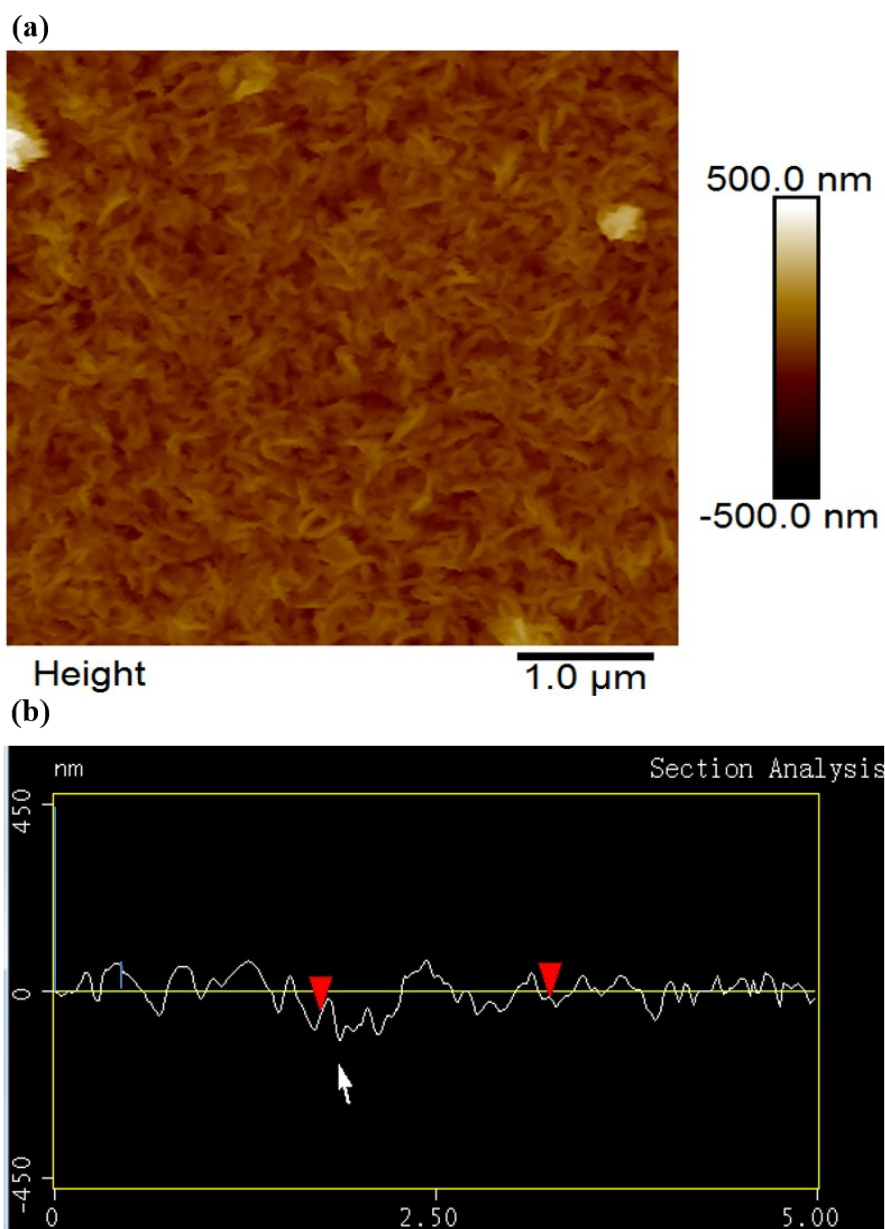

**Fig. S1 Morphology of the hierarchical MoS<sub>2</sub> nanofilms.** (a) AFM image of the thin films annealed in nitrogen at 250 °C for 12 h, which shows a typical hierarchical morphology. (b) Roughness of the thin films, which shows an average roughness of ~20 nm.

Figure S2

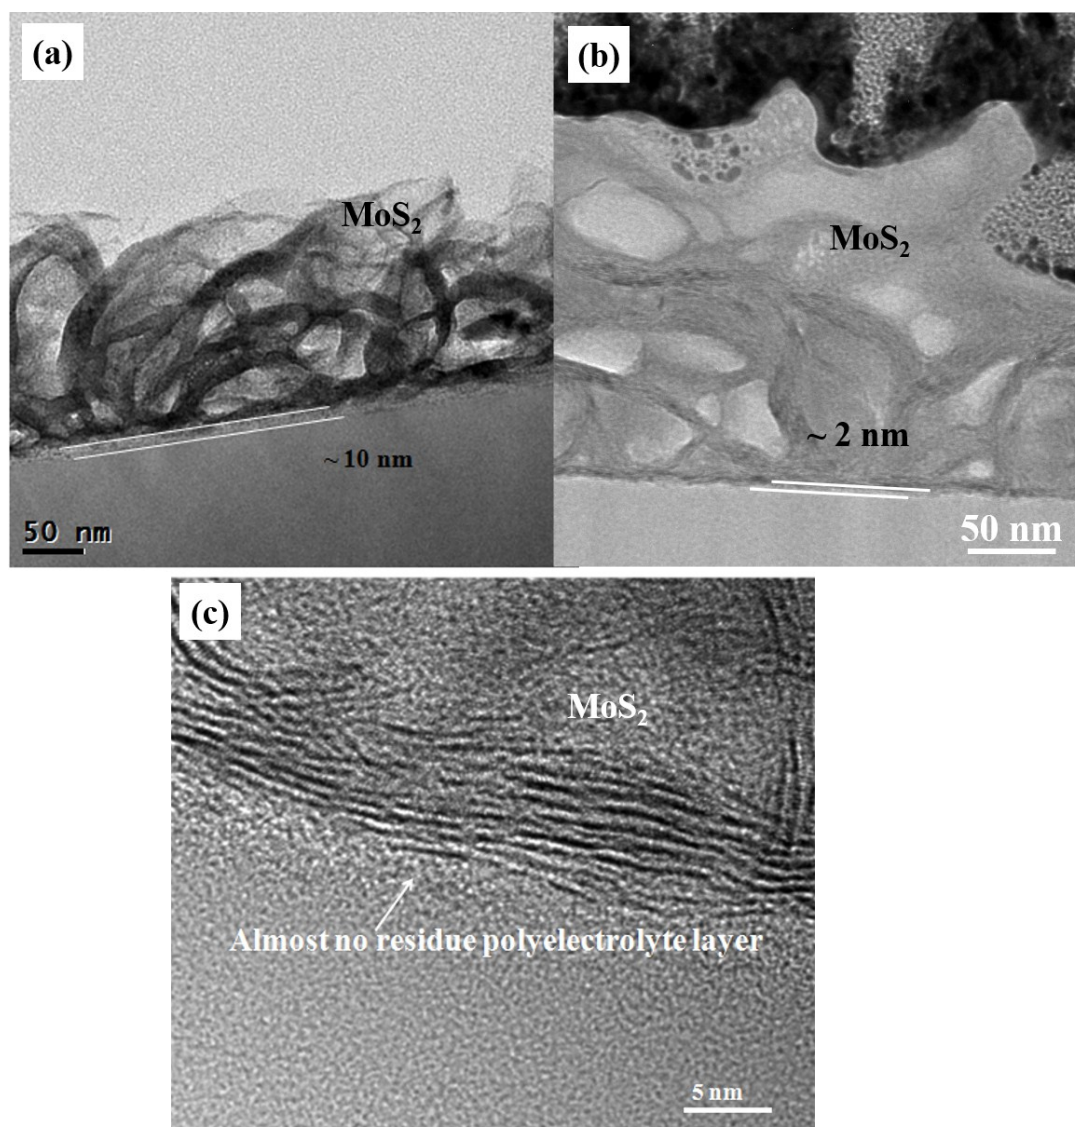

**Fig. S2 Typical cross-sectional TEM images of the MoS<sub>2</sub> nanofilms annealed at 250 °C in nitrogen atmosphere for different times. The thickness of the polyelectrolyte layer decreases from (a) ~10 nm for sample annealed for 0 h to (b) ~2 nm for sample annealed for 24 h and (c) almost no residue polyelectrolyte observed for sample annealed for 36 h.**

Figure S3

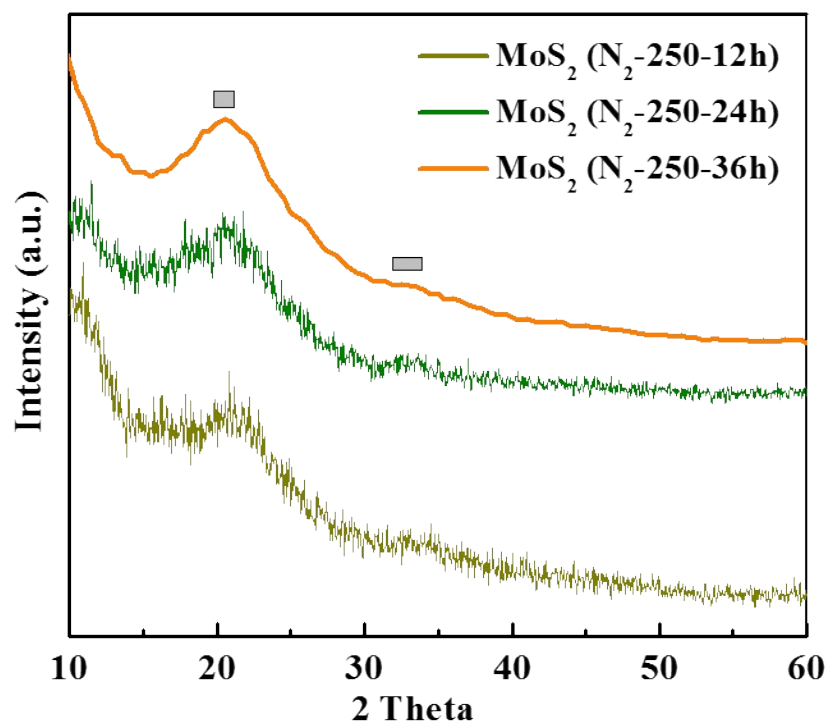

**Fig. S3 XRD patterns of the MoS<sub>2</sub> nanofilms annealed at 250 °C under N<sub>2</sub> atmosphere for different annealing times.** The diffraction peak from (002) plane of 2H MoS<sub>2</sub> is absent, suggesting the stacking of MoS<sub>2</sub> layers is not obvious. The diffraction peak at ~20.7 ° is from the quartz substrate, and the weak peak at ~33.1 ° can be ascribed to the (100) plane of 2H MoS<sub>2</sub>. The XRD results demonstrate that the obtained MoS<sub>2</sub> has low crystallinity.<sup>4,5</sup>

Figure S4

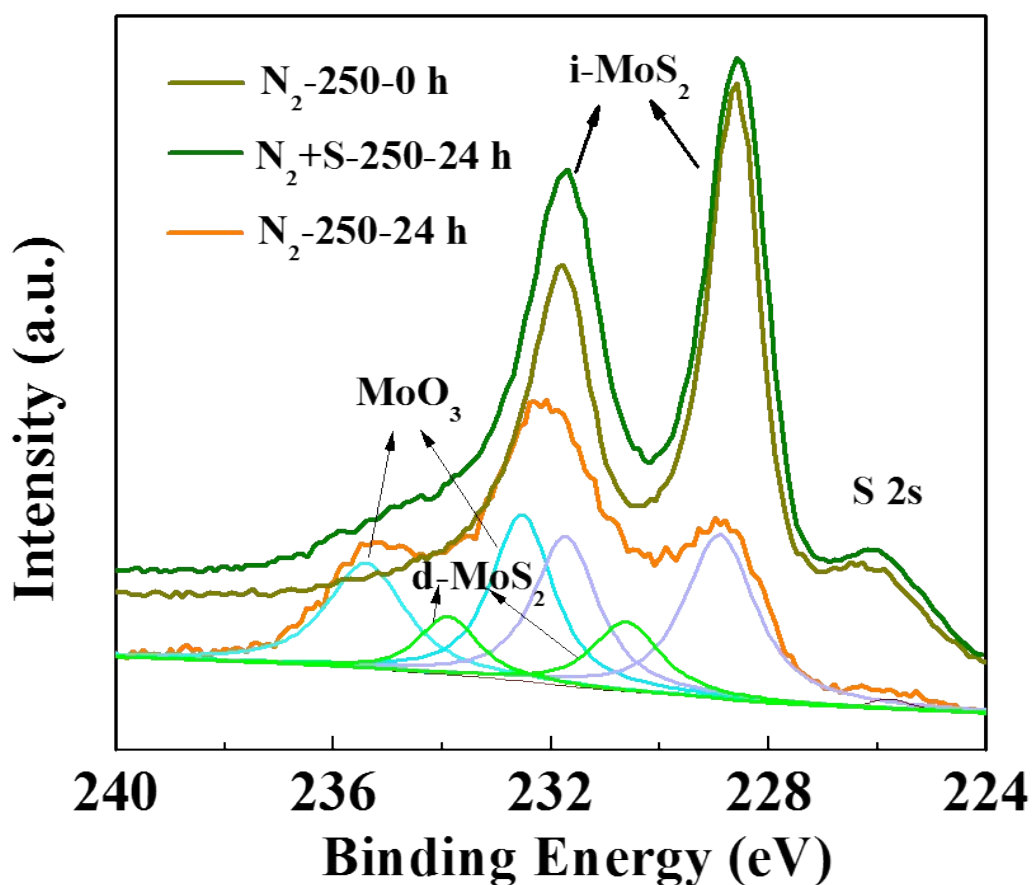

**Fig. S4 XPS spectra of the MoS<sub>2</sub> nanofilms obtained under different conditions.** i-MoS<sub>2</sub> means intrinsic MoS<sub>2</sub>; d-MoS<sub>2</sub> means defective MoS<sub>2</sub>, which is directly associated with S vacancies. MoS<sub>2</sub> (N<sub>2</sub>-250-0 h) means the as-prepared MoS<sub>2</sub> nanofilms without any annealing treatment, which has few S vacancies; MoS<sub>2</sub> (N<sub>2</sub>-250-24 h) means the MoS<sub>2</sub> nanofilms obtained after annealing in nitrogen atmosphere at 250°C for 24 h, which has S vacancies and MoO<sub>3</sub>; MoS<sub>2</sub> (N<sub>2</sub>+S-250-24 h) means the MoS<sub>2</sub> nanofilms obtained after annealing in sulfur-enriched nitrogen atmosphere at 250°C for 24 h, which is the same to that of MoS<sub>2</sub> (N<sub>2</sub>-250-0 h) with few S vacancies and MoO<sub>3</sub>.

Figure S5

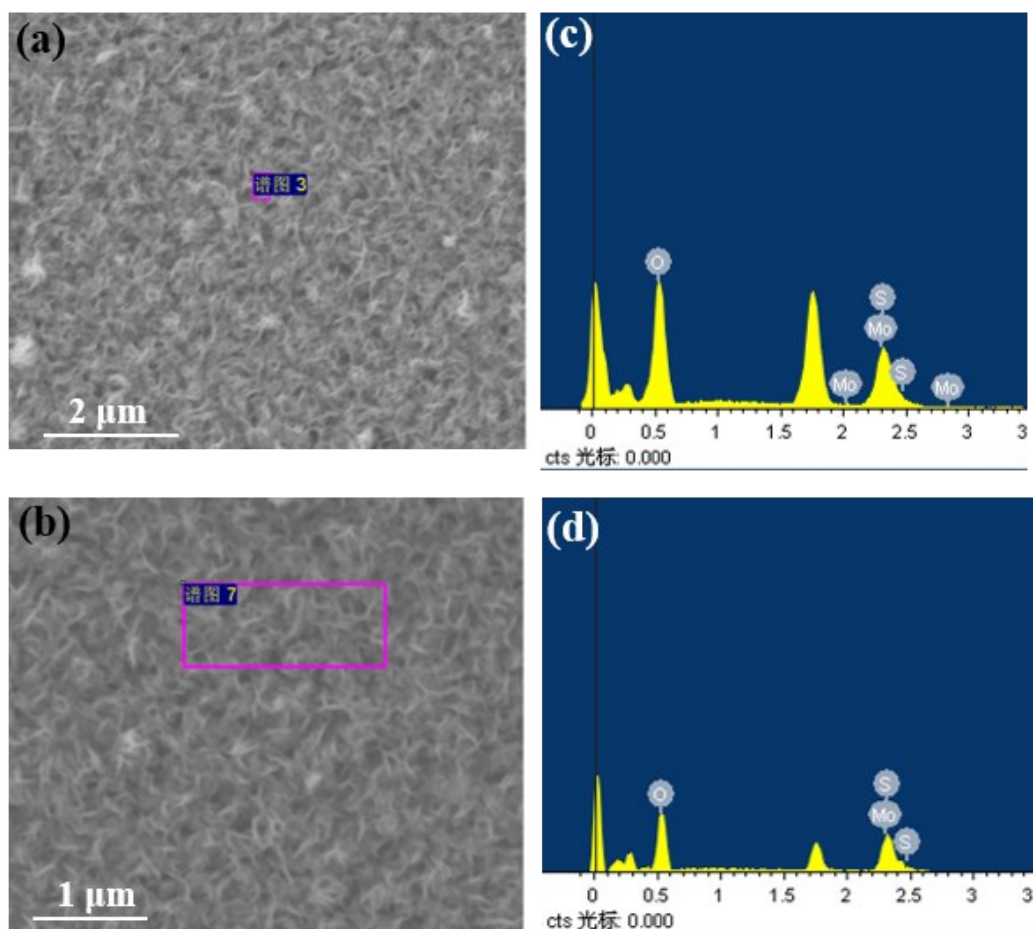

**Fig. S5 Elemental compositions of the MoS<sub>2</sub> nanofilms.** (a,b) Scanning electron microscopy (SEM) images and (c,d) elemental Energy Dispersive Spectrometer (EDS) results of the fabricated MoS<sub>2</sub> nanofilms annealed in nitrogen atmosphere at 250 °C for 12 h and 36 h, respectively. The results demonstrate that the samples are composed of MoS<sub>2</sub> with the atomic ratio of Mo and S almost 1:2.

Figure S6

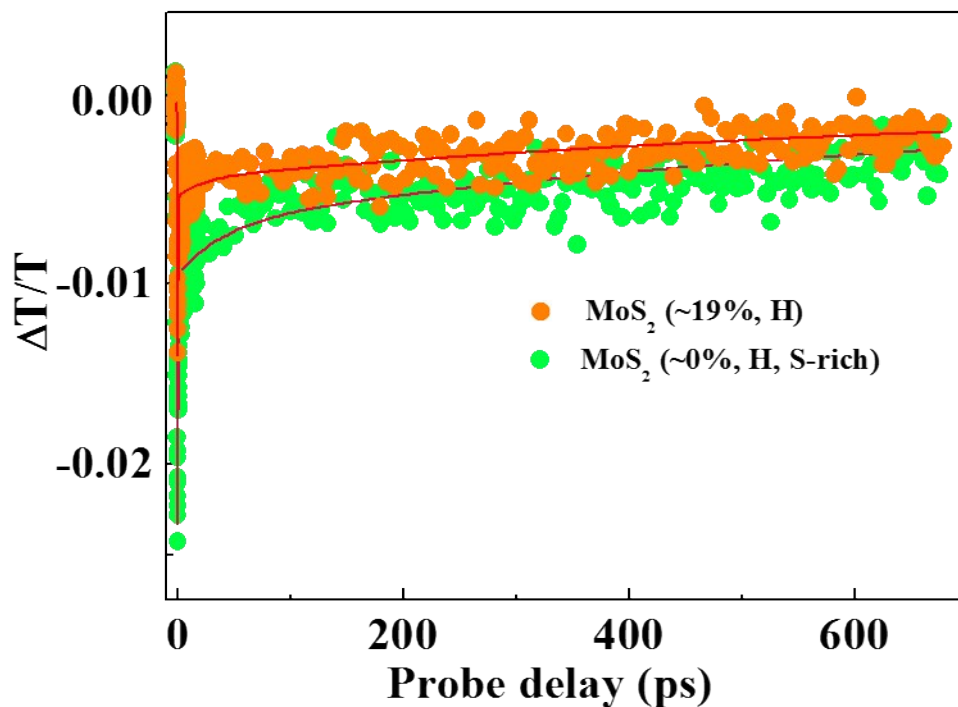

**Fig. S6 Pump-probe results of the  $\text{MoS}_2$  nanofilms with different S vacancies but the same crystallinity.**  $\text{MoS}_2$  (~19%, H) is the sample with the calculated atomic ratio of the S vacancies ~19% and increased crystallinity which is annealed in nitrogen atmosphere;  $\text{MoS}_2$  (~0%, H, S-rich) is the sample with increased crystallinity but almost no S vacancies which is annealed in S-enriched nitrogen atmosphere. The pulse intensity is  $\sim 16.3 \text{ GW cm}^{-2}$ .



**Table S1** Linear and NLO parameters of MoS<sub>2</sub> nanofilms with different S vacancies measured using the open-aperture Z-scan technique (Beam waist  $\sim 26.0 \mu\text{m}$ ).

| Sample                     | T (%) | $\alpha_0$ (cm <sup>-1</sup> )<br>(*10 <sup>4</sup> ) | $L$ (cm)<br>(*10 <sup>-7</sup> ) | $\beta_{\text{eff}}$<br>(cm GW <sup>-1</sup> )<br>(*10 <sup>2</sup> ) | $I_{\text{sat}}$<br>(GW cm <sup>-2</sup> ) | $\text{Im}\chi^{(3)}$<br>(esu)<br>(*10 <sup>-9</sup> ) | Damage<br>threshold<br>(GW cm <sup>-2</sup> ) |
|----------------------------|-------|-------------------------------------------------------|----------------------------------|-----------------------------------------------------------------------|--------------------------------------------|--------------------------------------------------------|-----------------------------------------------|
| MoS <sub>2</sub> (~0%, L)  | 30.9  | (3.9±0.2)                                             | (300±20)                         | (0.8±0.1)                                                             | /                                          | 0.5±0.1                                                | 32.6±2.7                                      |
| MoS <sub>2</sub> (~15%, H) | 40.2  | (3.2±0.3)                                             | (280±20)                         | (4.3±0.5)                                                             | 65±5                                       | 2.7±0.3                                                | 44.5±2.7                                      |
| MoS <sub>2</sub> (~19%, H) | 51.3  | (3.3±0.2)                                             | (200±20)                         | (3.4±0.3)                                                             | 70±5                                       | 2.2±0.2                                                | 74.1±3.5                                      |
| MoS <sub>2</sub> (~21%, H) | 60.7  | (3.1±0.2)                                             | 160±20                           | /                                                                     | 48±5                                       | /                                                      | 72.1±3.5                                      |

**Table S2** Parameters obtained from the fitting of Pump–Probe traces with the pulse intensity as 16.3 GW cm<sup>-2</sup>.

| Sample                           | $\tau_1$ (ps) | $\tau_2$ (ps) | $\tau_3$ (ps) |
|----------------------------------|---------------|---------------|---------------|
| MoS <sub>2</sub> (~0%, L)        | 0.28±0.03     | 20±2          | 610±60        |
| MoS <sub>2</sub> (~15%, H)       | 0.28±0.03     | 30±5          | 600±50        |
| MoS <sub>2</sub> (~19%, H)       | 0.28±0.03     | 35±5          | 620±60        |
| MoS <sub>2</sub> (~21%, H)       | 0.30±0.03     | 35±5          | 600±50        |
| MoS <sub>2</sub> (~0, H, S-rich) | 0.30±0.03     | 40±5          | 610±60        |

## References

---

- 1 J. P. Perdew, K. Burke and M. Ernzerhof, *Phys. Rev. Lett* 1996, **77**, 3865.
- 2 J. Heyd, G. E. Scuseria and M. Ernzerhof, *J. Chem. Phys* 2003, **118**, 8207-8215.
- 3 M. X. Liu, J. P. Shi, Y. C. Li, X. B. Zhou, D. L. Ma, Y. Qi, Y. F. Zhang and Z. F. Liu, *Small* 2017, **13**(40), 1602967.
- 4 L. Ma, X.P. Zhou, X.Y. Xu, L.M. Xu, L.L. Zhang and W.X. Chen, *Advanced Powder Technology* 2015, **26**, 1273-1280.
- 5 H. S. S. R. Matte, A. Gomathi, A. K. Manna, D. J. Late, R. Datta, S. K. Pati and C. N. R. Rao, *Angew. Chem. Int. Ed.* 2010, **49**, 4059-4062.
